# Supplementary material
Source: PubMed Central journal article supplement (PMC240751)

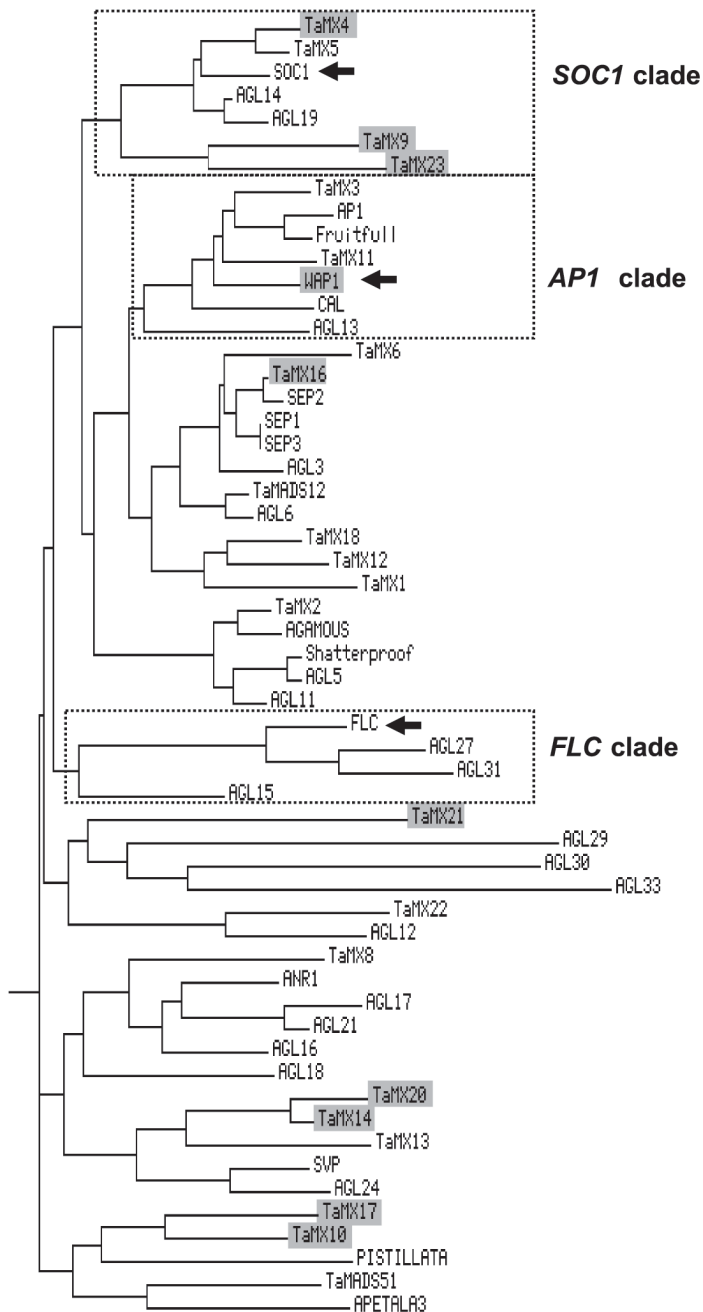

Supplement: pnas_100_22_13099__5.pdf [file pnas_100_22_13099__5.pdf]
